# Supplementary material for: Aliovalent doping engineering enables multiple modulations of FeS2anodes to achieve fast and durable sodium storage
Source: Royal Society of Chemistry journal article supplement (doi:10.1039/d2ta06401d), 2022-01-01
Supplement: d2ta06401d1.pdf [file d2ta06401d1.pdf]

## Electronic Supplementary Information

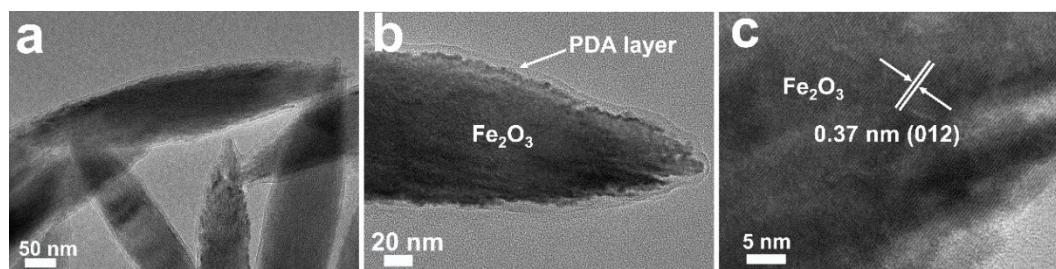

Fig. S1. TEM and HRTEM images of Fe<sub>2</sub>O<sub>3</sub>@PDA.

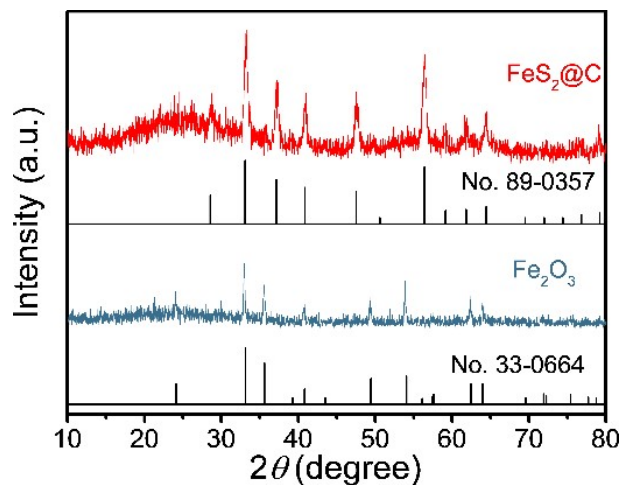

Fig. S2. XRD patterns of Fe<sub>2</sub>O<sub>3</sub> and FeS<sub>2</sub>@C.

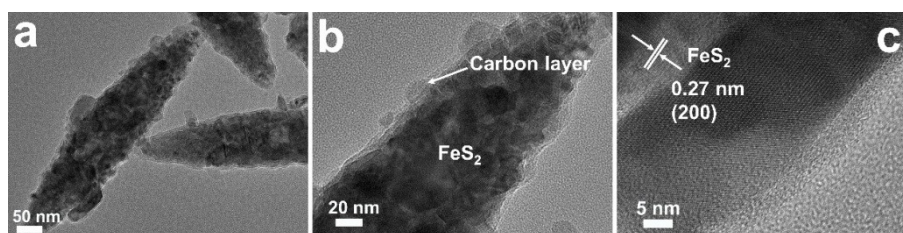

Fig. S3. TEM and HRTEM images of FeS<sub>2</sub>@C.

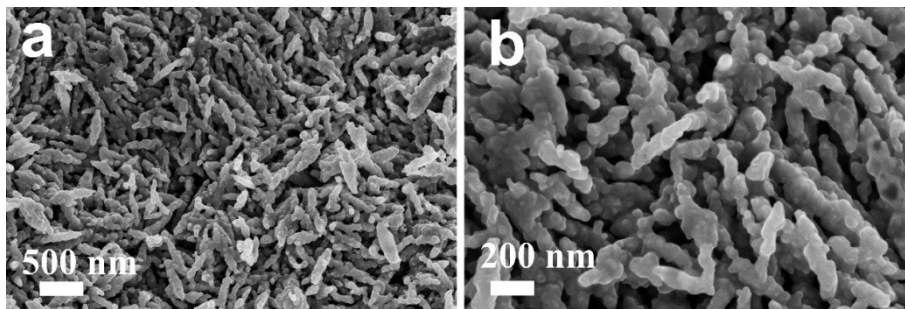

**Fig. S4.** SEM images of bare FeS<sub>2</sub> without carbon coating.

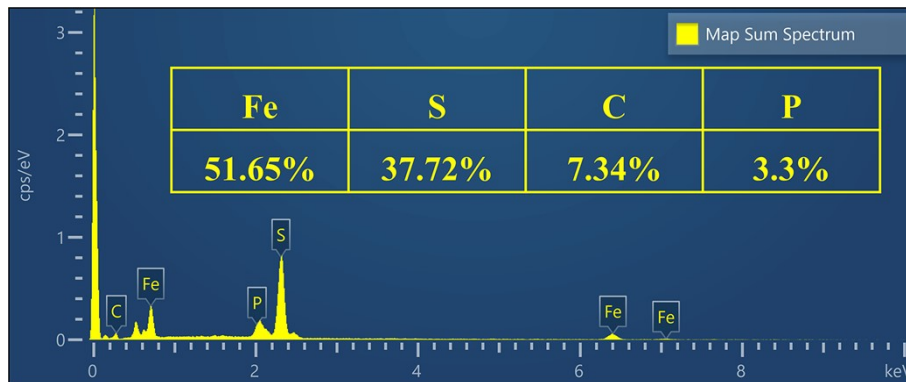

**Fig. S5.** The EDX spectrum of P-FeS<sub>2</sub>@C material.

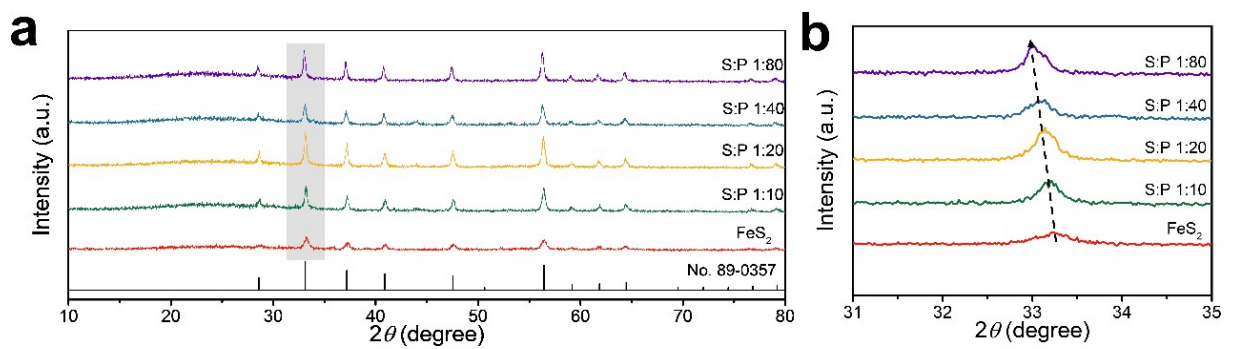

**Fig. S6.** XRD patterns of FeS<sub>2</sub>@C with different doping contents and partial enlarged detail.

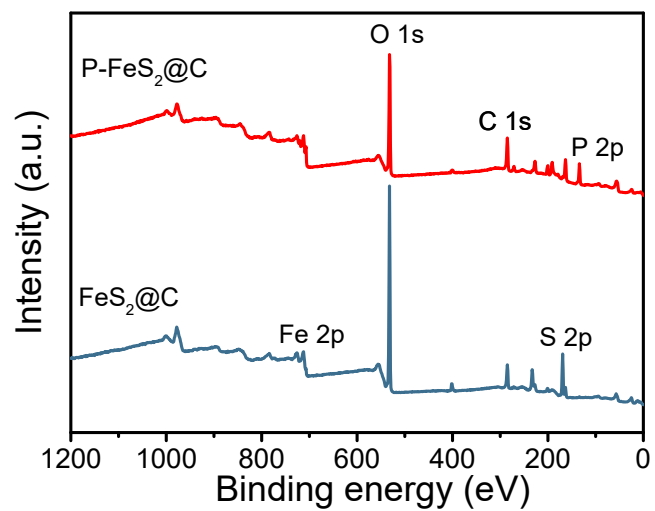

**Fig. S7.** XPS survey spectra of FeS<sub>2</sub>@C and P-FeS<sub>2</sub>@C.

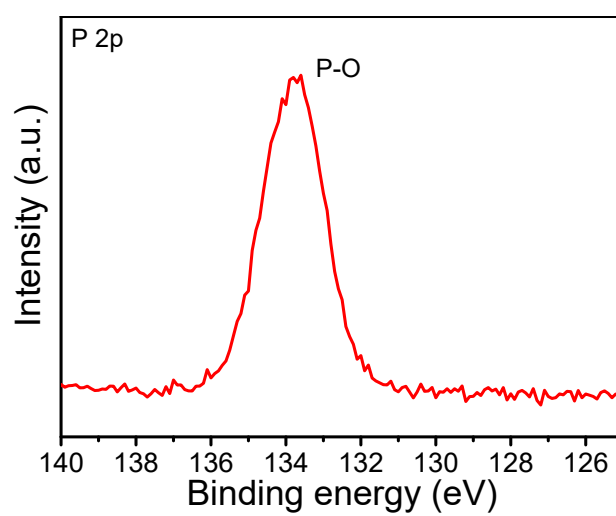

**Fig. S8.** P 2p XPS spectrum of P-FeS<sub>2</sub>@C.

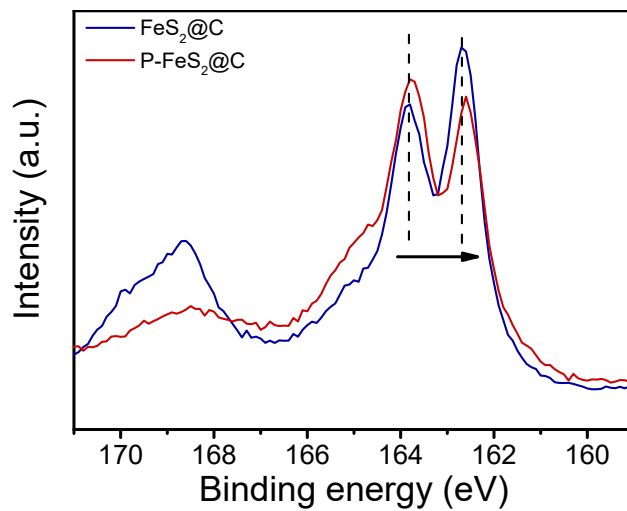

**Fig. S9.** S 2p XPS spectra of FeS<sub>2</sub>@C and P-FeS<sub>2</sub>@C.

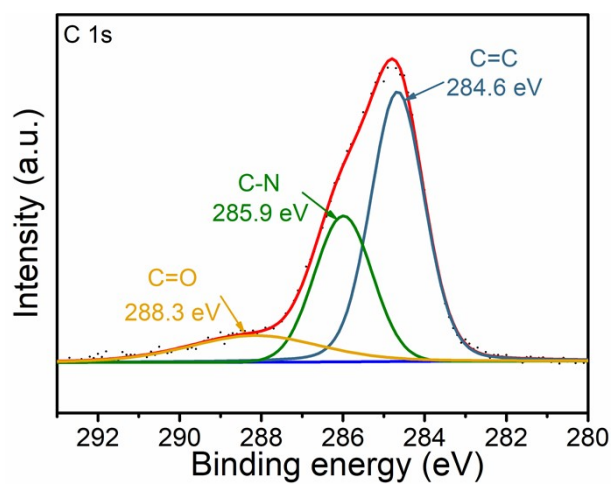

**Fig. S10.** C 1s XPS spectrum of P-FeS<sub>2</sub>@C.

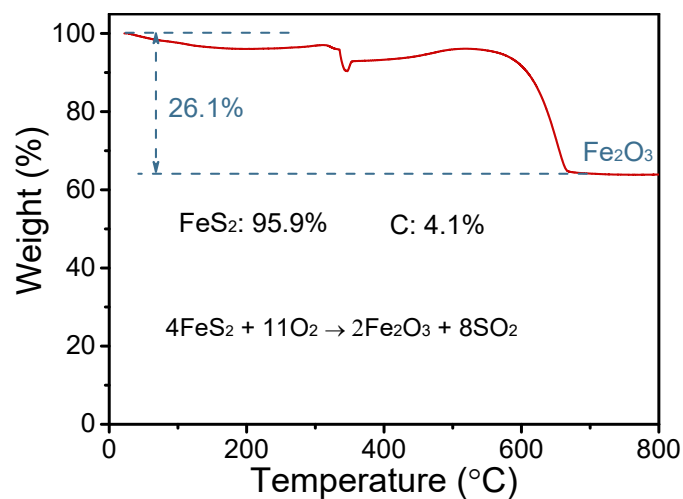

**Fig. S11.** TG curve of P-FeS<sub>2</sub>@C.

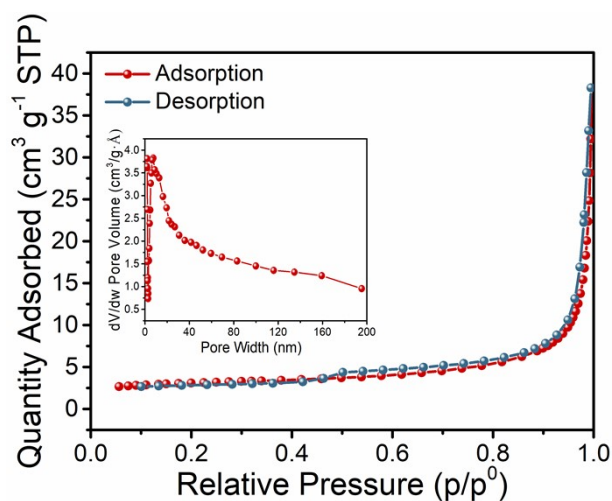

**Fig. S12.** The N<sub>2</sub> adsorption-desorption isotherms and inset of porous size distribution curves of P-FeS<sub>2</sub>@C.

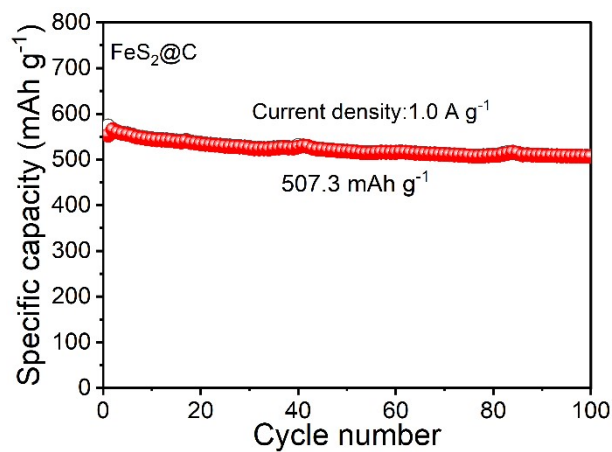

**Fig. S13.** Cycling performance of FeS<sub>2</sub>@C under 1.0 A g<sup>-1</sup>.

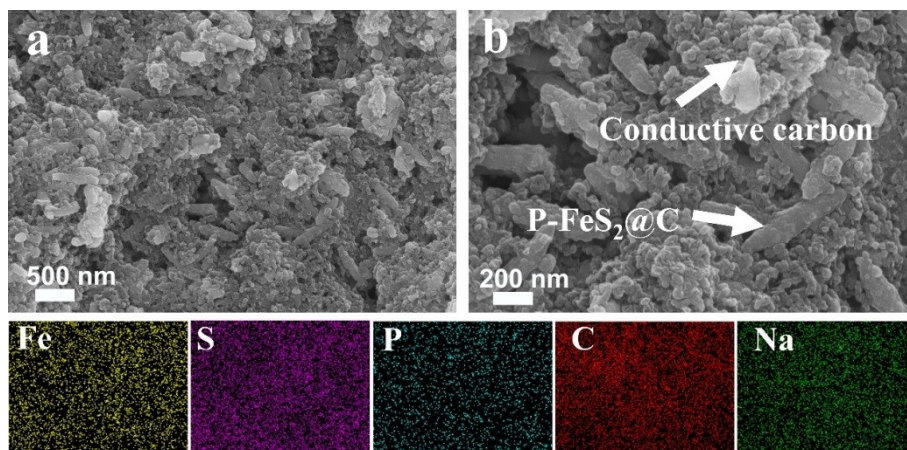

**Fig. S14.** SEM and elemental mapping images of P-FeS<sub>2</sub>@C electrode after cycling.

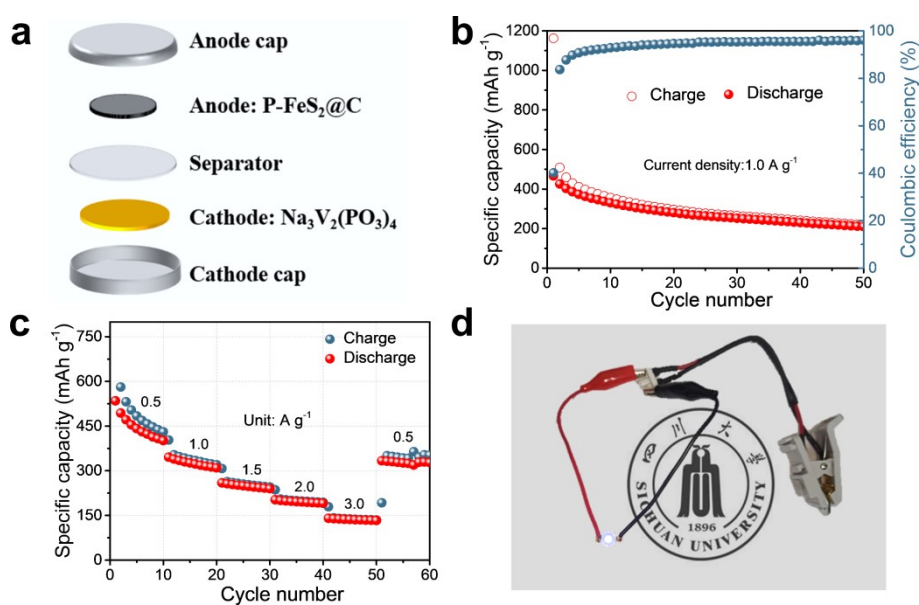

**Fig. S15.** (a) Schematic diagram of P-FeS<sub>2</sub>@C||Na<sub>3</sub>V<sub>2</sub>(PO<sub>4</sub>)<sub>3</sub> full battery. (b) Cycling performance at 1.0 A g<sup>-1</sup>, (c) rate capability of full battery. (d) Photograph of a charged full cell lighting light-emitting diode.



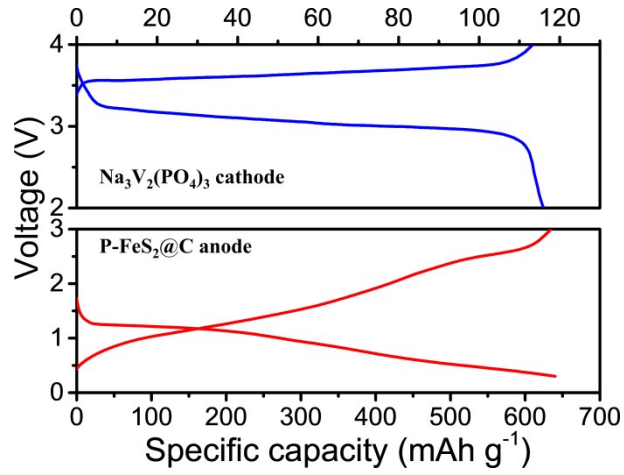

**Fig. S16.** The discharge/charge profiles of P-FeS<sub>2</sub>@C anode and Na<sub>3</sub>V<sub>2</sub>(PO<sub>4</sub>)<sub>3</sub> cathode.

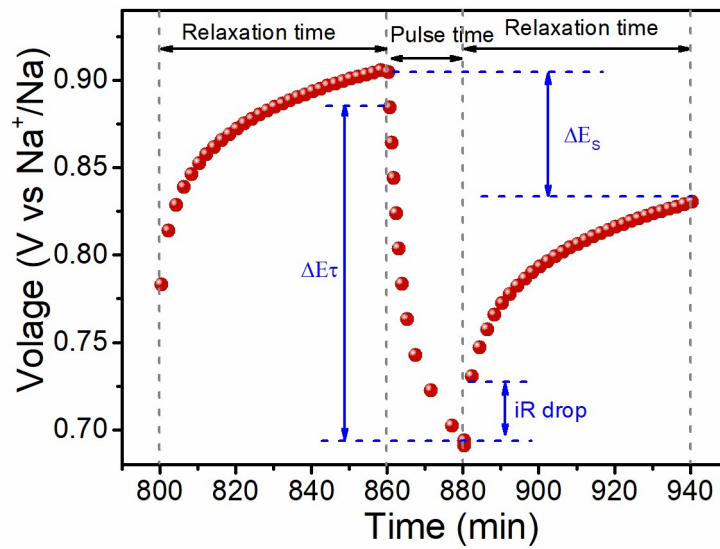

**Fig. S17.** E vs. t curves of P-FeS<sub>2</sub>@C electrode in a signal GITT during the discharge process.

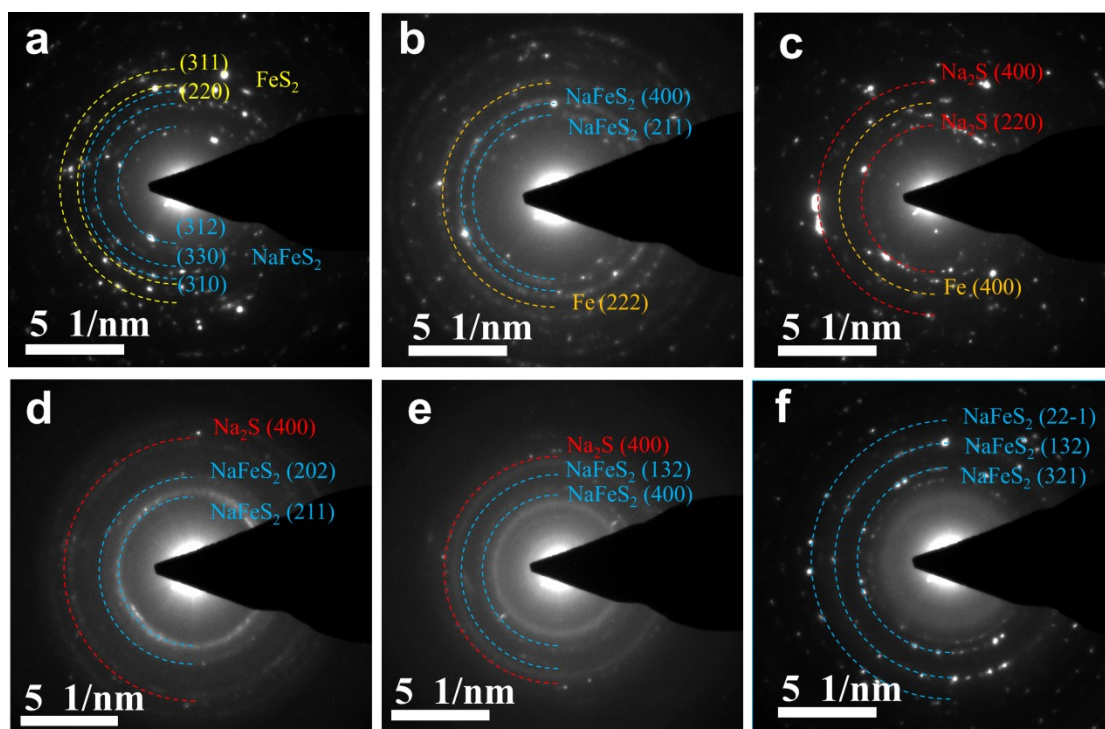

**Fig. S18.** SAED images of P-FeS<sub>2</sub>@C anode in the initial discharge/charge state: (a-c) discharge to 1.5, 0.8, and 0.3 V, respectively; (d-f) charge to 1.2, 2.2, and 3.0 V, respectively.

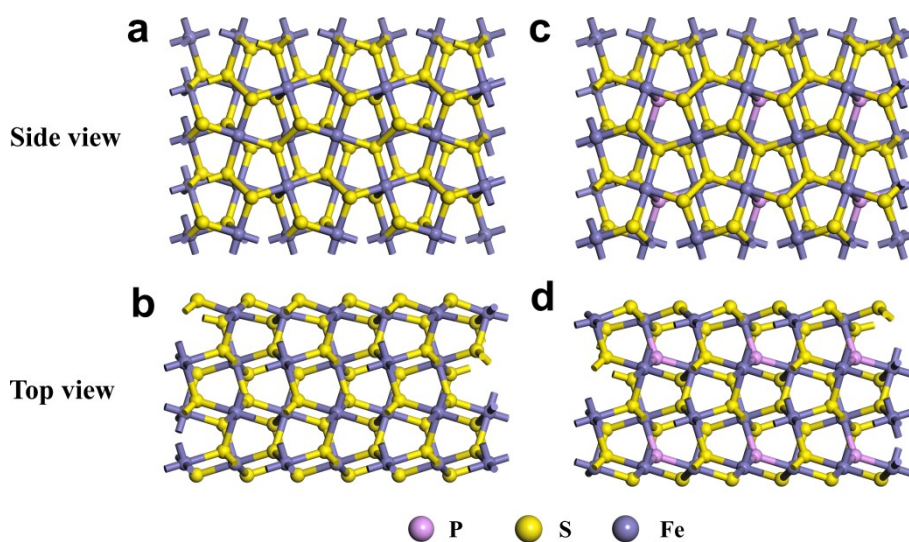

**Fig. S19.** The optimized geometry configurations of (a, b) pristine FeS<sub>2</sub> and (c, d) P-FeS<sub>2</sub> (200) plane.



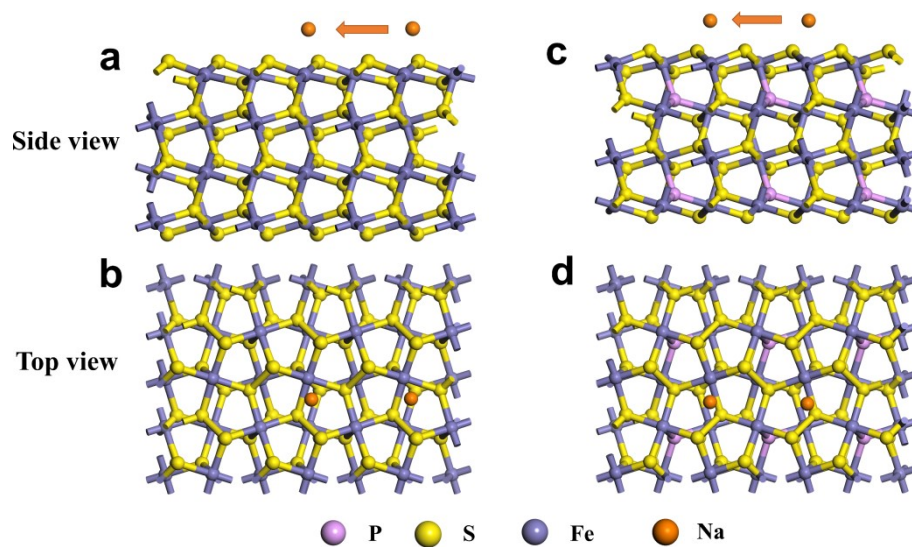

**Fig. S20.** The optimal diffusion path for  $\text{Na}^+$  on (a, b) pristine  $\text{FeS}_2$  and (c, d)  $\text{P-FeS}_2$ .

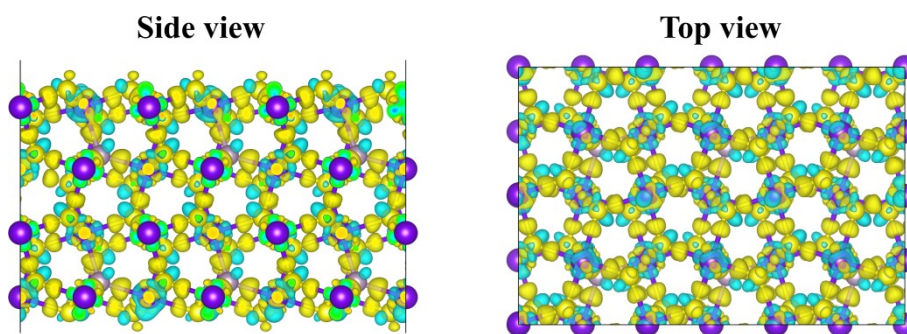

**Fig. S21.** The charge and spin density distribution after P doping.

**Table S1.** Calculated  $b$  values corresponding to the redox peaks in the CV curves of electrodes and capacitive contribution at  $1.0 \text{ mV s}^{-1}$

|                                     | O1    | O2    | R1    | R2   | Capacitive contribution<br>( $1.0 \text{ mV s}^{-1}$ ) |
|-------------------------------------|-------|-------|-------|------|--------------------------------------------------------|
| FeS <sub>2</sub> @C                 | 0.919 | 0.916 | 0.784 | 1.07 | 82.8%                                                  |
| S:P 1:10                            | 1.04  | 0.708 | 0.854 | 1.17 | 85.4%                                                  |
| S:P 1:20                            | 0.955 | 0.758 | 0.845 | 1.12 | 87.1%                                                  |
| S:P 1:40                            | 0.911 | 0.835 | 0.867 | 1.01 | 86.5%                                                  |
| S:P 1:80<br>(P-FeS <sub>2</sub> @C) | 1.01  | 0.77  | 0.82  | 1.11 | 87.6%                                                  |
